# Supplementary material for: Immunogenic Cell Death Photothermally Mediated by Erythrocyte Membrane-Coated Magnetofluorescent Nanocarriers Improves Survival in Sarcoma Model
Source: MDPI journal article supplement (doi:10.3390/pharmaceutics15030943), 2023-03-14
Supplement: s1 [file s1]

# Immunogenic Cell Death Photothermally Mediated by Erythrocyte Membrane-Coated Magnetofluorescent Nanocarriers Improves Survival in Sarcoma Model

Ailton Antonio Sousa-Junior<sup>1,2</sup>, Francylli Mello-Andrade<sup>3,4</sup>, João Victor Ribeiro Rocha<sup>1</sup>,  
Tácio Gonçalves Hayasaki<sup>2</sup>, Juliana Santana de Curcio<sup>3</sup>, Livia do Carmo Silva<sup>3</sup>, Ricardo Costa de Santana<sup>1</sup>,  
Eliana Martins Lima<sup>2,5</sup>, Cléver Gomes Cardoso<sup>3</sup>, Elisângela de Paula Silveira-Lacerda<sup>3</sup>,  
Sebastião Antonio Mendanha<sup>1,2,5</sup> and Andris Figueiroa Bakuzis<sup>1,5,\*</sup>

<sup>1</sup> Institute of Physics, Federal University of Goiás, Goiania 74690-900, GO, Brazil

<sup>2</sup> FarmaTec, School of Pharmacy, Federal University of Goiás, Goiania 74690-631, GO, Brazil

<sup>3</sup> Biological Sciences Institute, Federal University of Goiás, Goiania 74045-155, GO, Brazil

<sup>4</sup> Federal Institute of Education, Science and Technology of Goiás, Goiania 74055-110, GO, Brazil

<sup>5</sup> CNanoMed, Federal University of Goiás, Goiania 74690-631, GO, Brazil

\* Correspondence: bakuzis@ufg.br

## Supplementary Information

### TEM images and EDS spectra

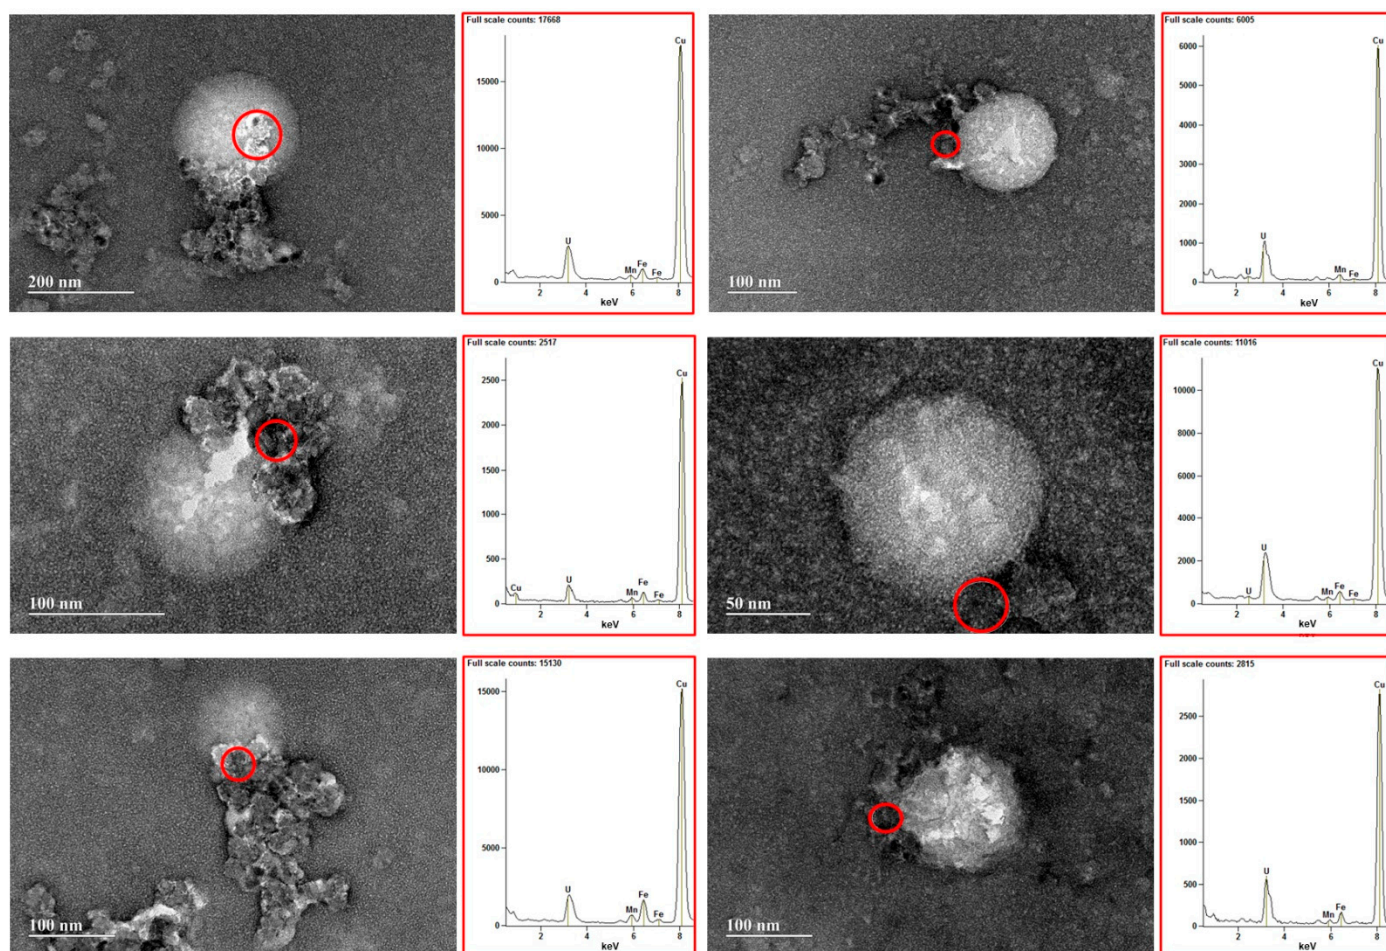

**Figure S1** – Representative RBCm-IR-Mn TEM images and corresponding EDS (energy dispersive spectroscopy) spectra

## NTA size distributions

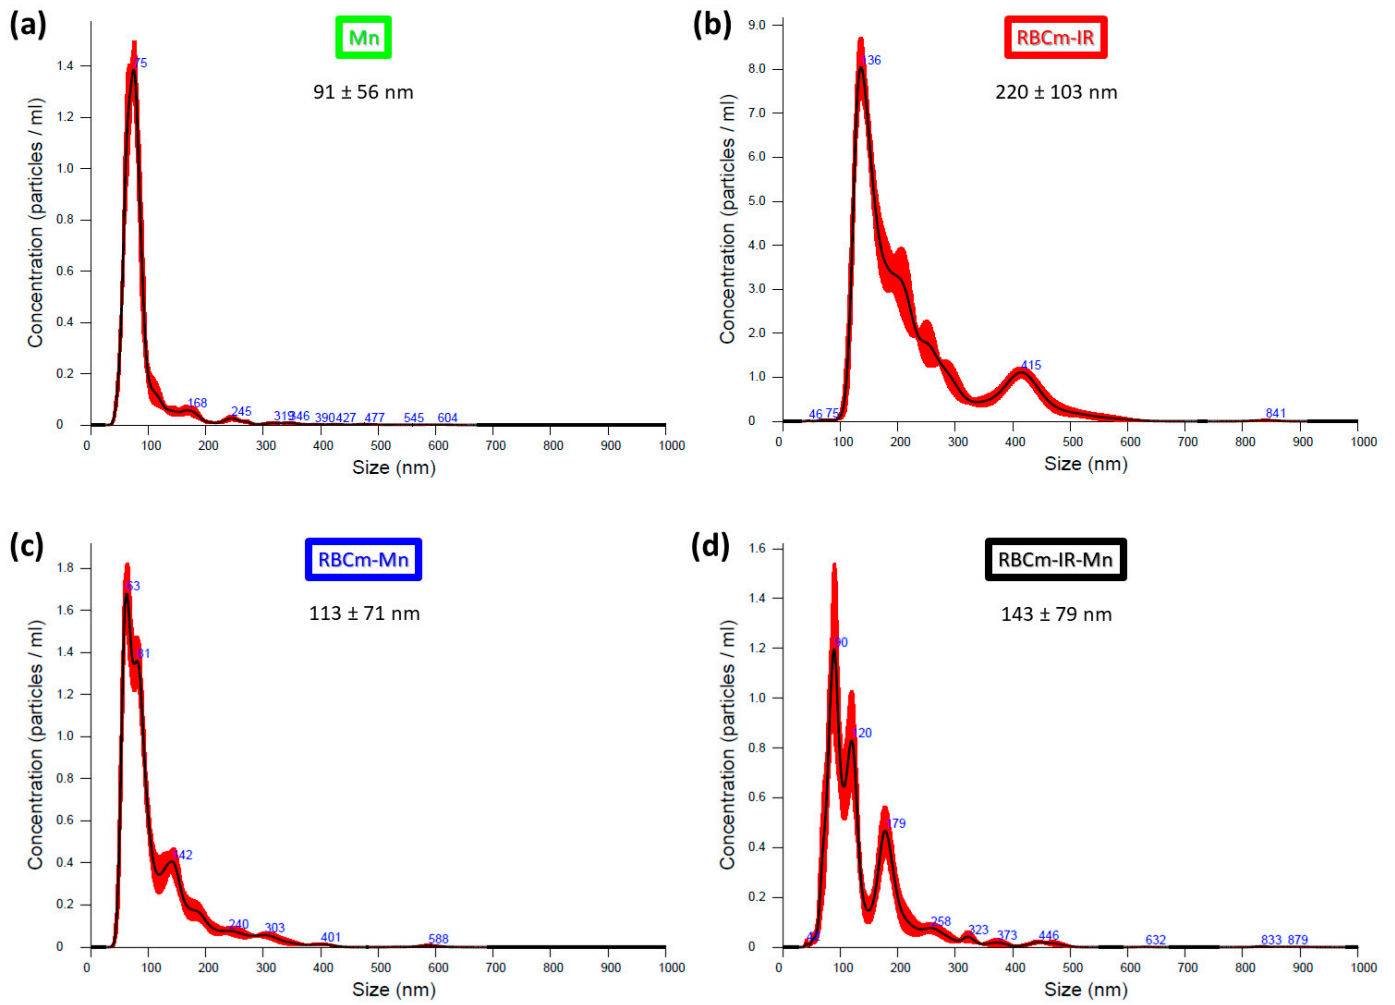

**Figure S2 – (a) Mn-ferrite nanoparticles. (b) RBCm-IR control sample. (c) RBCm-Mn control sample. (d) RBCm-IR-Mn nanocarrier.** Average diameters are reported as mean  $\pm$  SD.

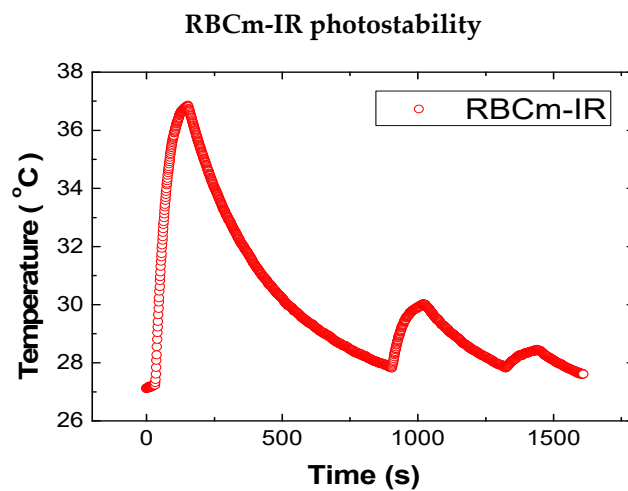

**Figure S3 – RBCm-IR shows photobleaching under sequential PTT cycles.**

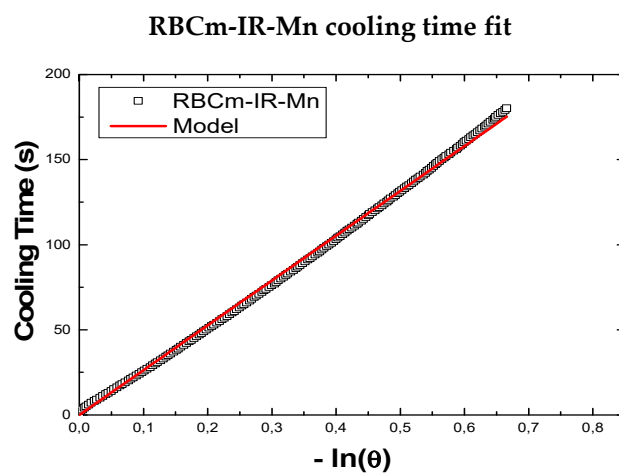

**Figure S4** – Linear fit corresponding to the cooling time of RBCm-IR-Mn (step for PCE determination).

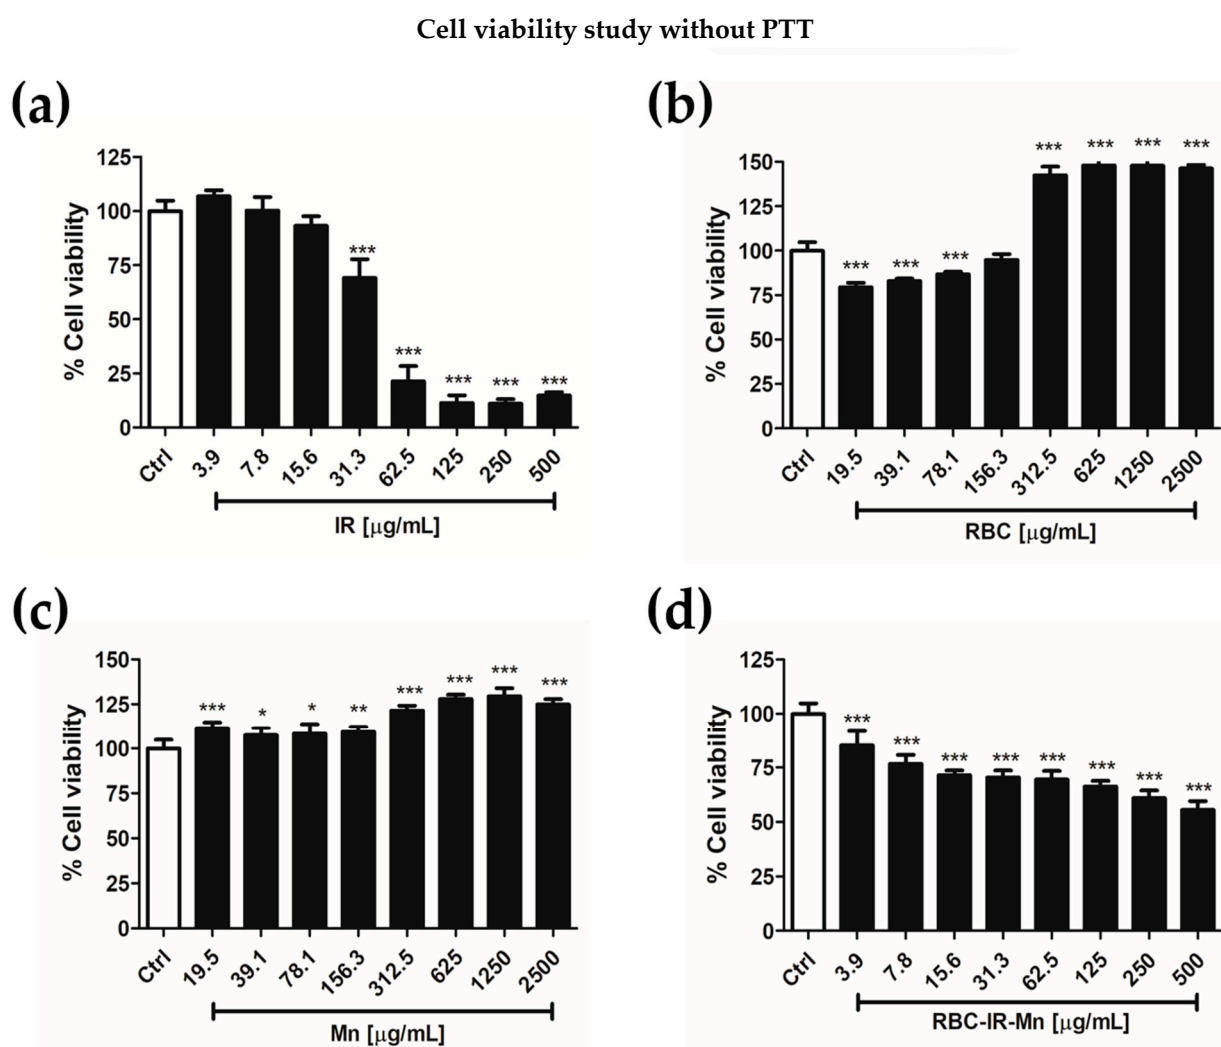

**Figure S5** – Cell viability study without laser irradiation. MTT study as function of the concentration of (a) free IR-780 concentration; (b) erythrocyte membrane vesicles (without IR-780 and without magnetic nanoparticles); (c) Mn-ferrite nanoparticles; and (d) RBCm-IR-Mn nanocarriers.

### PTT for nonspecific laser heating

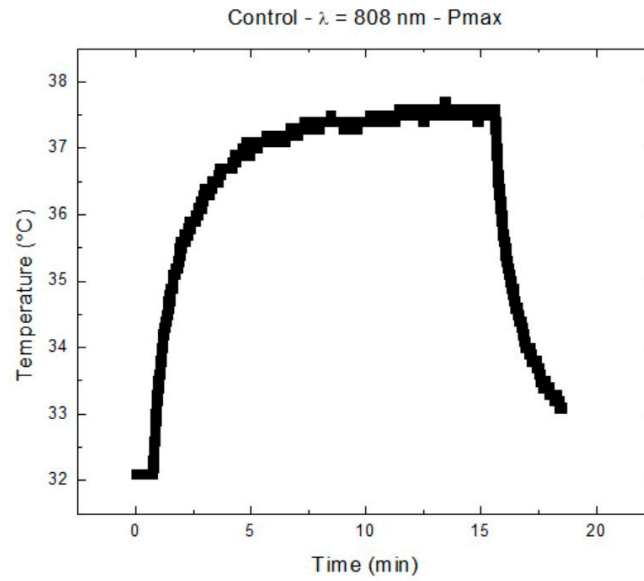

Figure S6 – Control tumor-bearing animal submitted to PTT for the determination of nonspecific heating.

### Tumor Evolution and PTT treatments for animal GM-SM

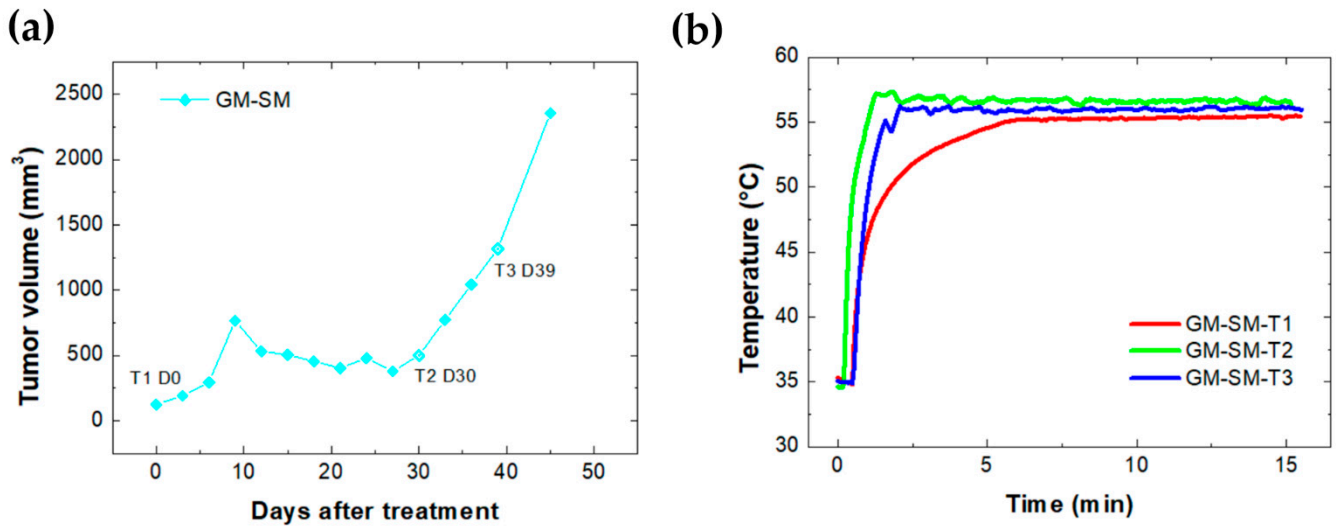

Figure S7 – (a) Tumor volume evolution and (b) temperature profile for PTT treatments performed for animal GM-SM

*In vivo* preclinical PTT study – Average profiles

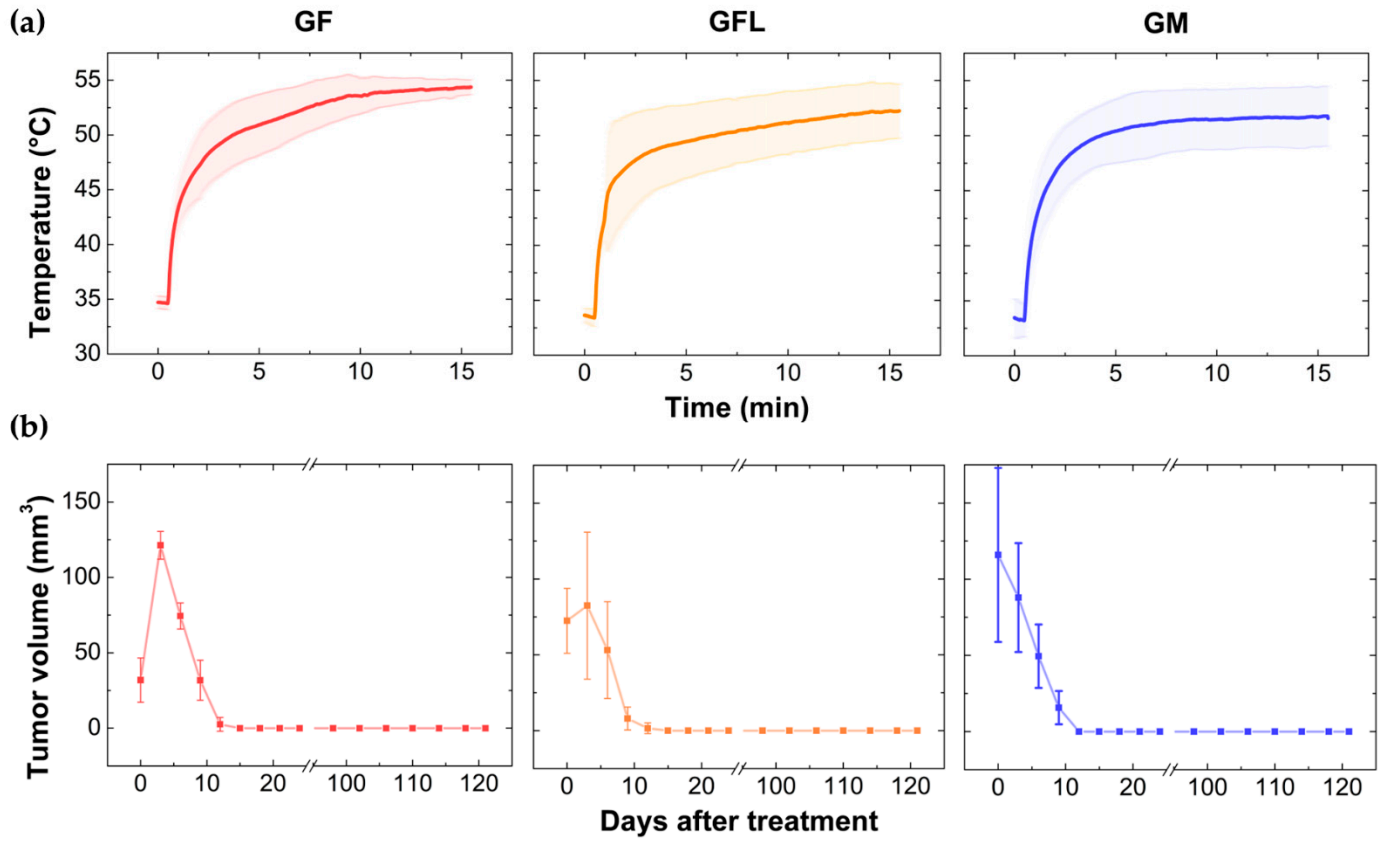

**Figure S8 – (a) Mean PTT temperature profiles and (b) Mean tumor volume evolution** for animals in groups GF ( $n = 4$ ), GFL ( $n = 5$ ), and GM ( $n = 4$ ). Datapoints are expressed as mean  $\pm$  SD.
